# Supplementary material
Source: MDPI journal article supplement (https://www.mdpi.com/2073-4352/13/9/1391)
Supplement: s1 [file s1]

## Supplementary Material

### D,L-Citrullinato-Bipyridine copper complex: Experimental and theoretical characterization

Diego Ramírez-Contreras<sup>1</sup>, Amalia Garcia-Garcia<sup>1,3</sup>, Ángel Mendoza<sup>1</sup>, Brenda Sánchez Gaytán<sup>1</sup>, Francisco J. Meléndez<sup>2</sup>, María Eugenia Castro<sup>1</sup>, and Enrique González-Vergara<sup>1\*</sup>.

<sup>1</sup>Centro de Química del Instituto de Ciencias, Benemérita Universidad Autónoma de Puebla, 18 sur y Av. San Claudio, Col. San Manuel, C. P. 72570 Puebla, Mexico; [brenda.sanchez@viep.com.mx](mailto:brenda.sanchez@viep.com.mx) (B.L.S.-G.)

<sup>2</sup>Facultad de Ciencias Químicas, Benemérita Universidad Autónoma de Puebla, 18 sur y Av. San Claudio, Col. San Manuel, C. P. 72570 Puebla, Mexico; [francisco.melendez@correo.buap.mx](mailto:francisco.melendez@correo.buap.mx) (F.J.M.-B.)

<sup>3</sup>Departamento de Química Inorgánica, Facultad de Ciencias, Universidad de Granada, Av. Fuente Nueva s/n, 18003 Granada, Spain; [amaliagar@ugr.es](mailto:amaliagar@ugr.es) (A.G.-G.)

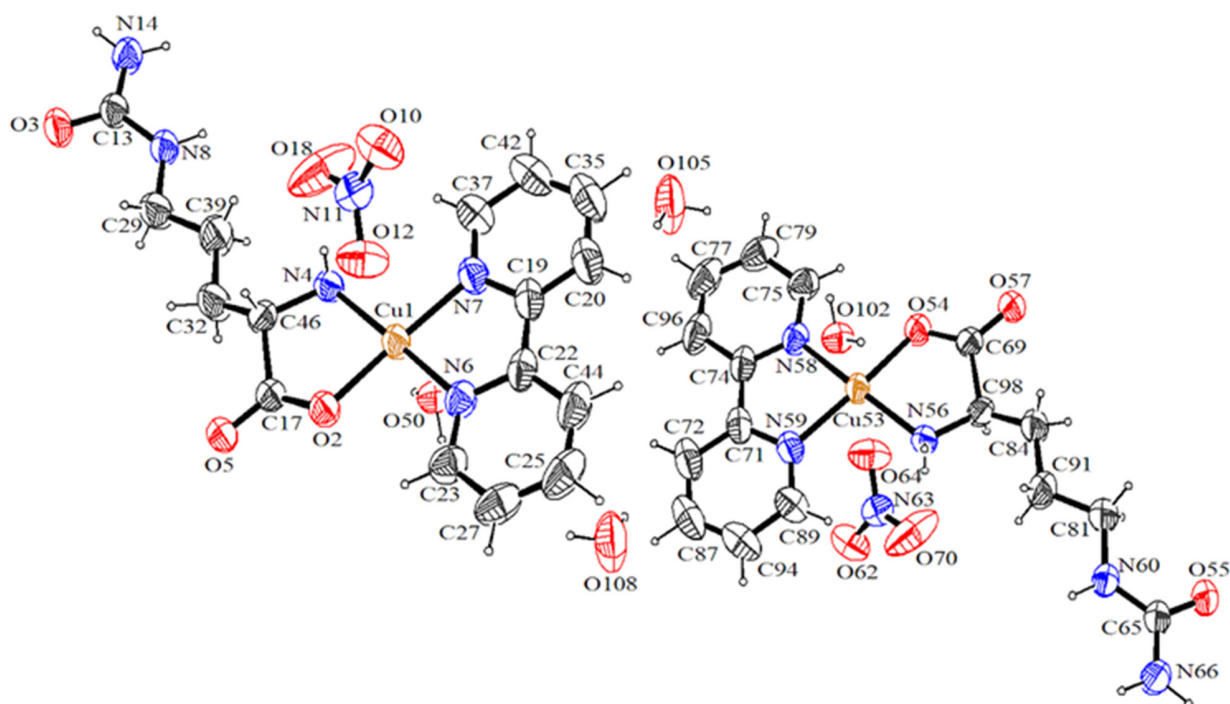

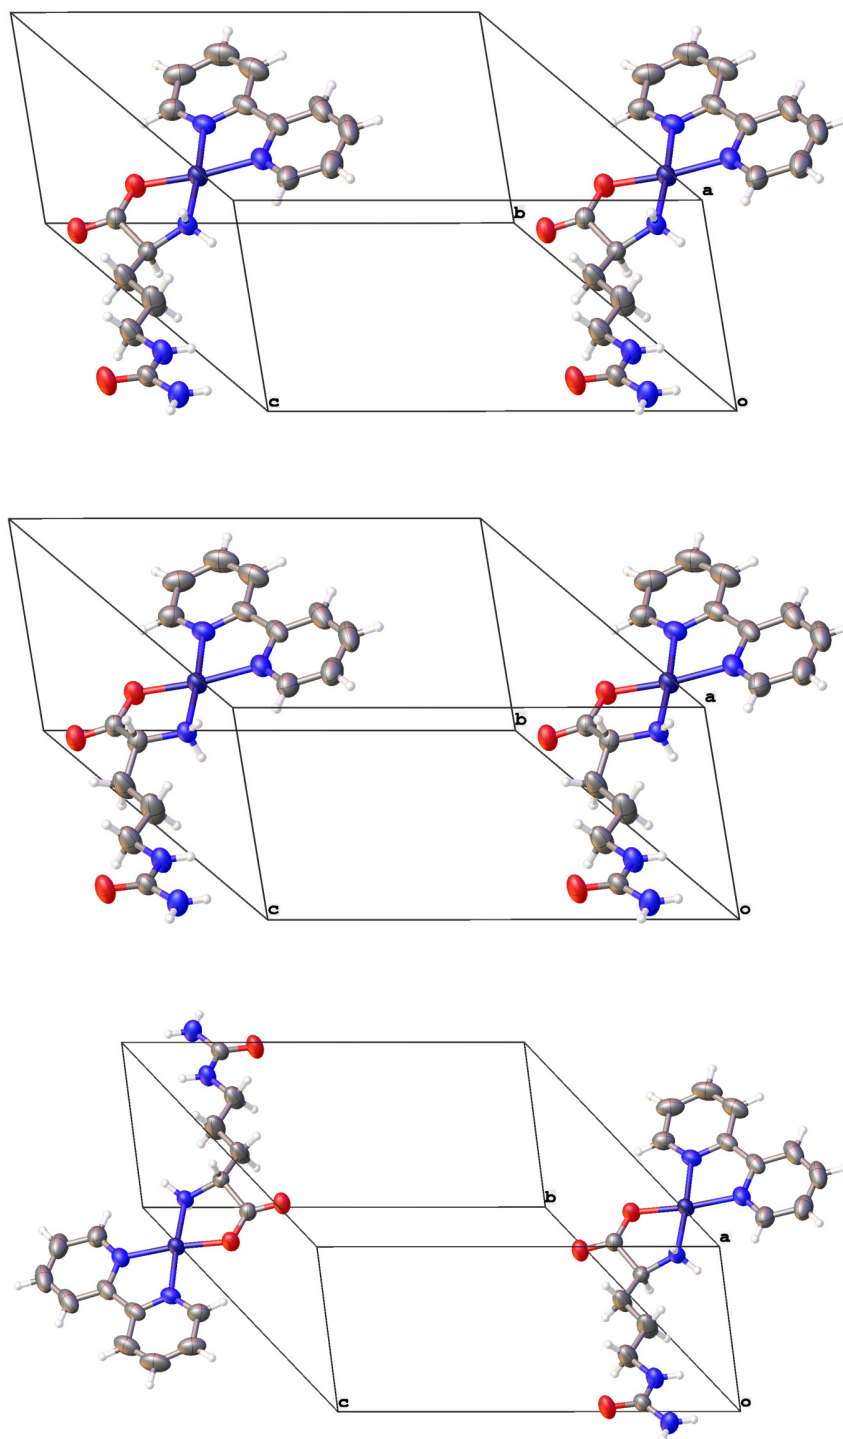

**Figure S2.** Enantiomers L, L, D, D and D, L

**Table S1. Crystal data**

|                                                 |                                                         |
|-------------------------------------------------|---------------------------------------------------------|
| $C_{16}H_{20}CuN_5O_3 \cdot 2(H_2O) \cdot NO_3$ | $Z = 2$                                                 |
| $M_r = 491.95$                                  | $F(000) = 510$                                          |
| Triclinic, $P\bar{1}$                           | $D_x = 1.476 \text{ Mg m}^{-3}$                         |
| $a = 7.2136 (3) \text{ \AA}$                    | Mo $K\alpha$ radiation, $\lambda = 0.71073 \text{ \AA}$ |
| $b = 12.2497 (6) \text{ \AA}$                   | Cell parameters from 13926 reflections                  |
| $c = 14.1356 (6) \text{ \AA}$                   | $\theta = 3.2\text{--}28.5^\circ$                       |
| $\alpha = 65.430 (4)^\circ$                     | $\mu = 1.04 \text{ mm}^{-1}$                            |
| $\beta = 77.331 (3)^\circ$                      | $T = 293 \text{ K}$                                     |
| $\gamma = 82.046 (3)^\circ$                     | Block, blue                                             |
| $V = 1106.75 (9) \text{ \AA}^3$                 | $0.32 \times 0.25 \times 0.20 \text{ mm}$               |

|                                                                                                                                                                                                                 |                                                                        |
|-----------------------------------------------------------------------------------------------------------------------------------------------------------------------------------------------------------------|------------------------------------------------------------------------|
| Xcalibur, Atlas, Gemini diffractometer                                                                                                                                                                          | 6762 independent reflections                                           |
| Radiation source: fine-focus sealed X-ray tube, Enhance (Mo) X-ray Source                                                                                                                                       | 5370 reflections with $I > 2\sigma(I)$                                 |
| Graphite monochromator                                                                                                                                                                                          | $R_{\text{int}} = 0.038$                                               |
| Detector resolution: $10.5564 \text{ pixels mm}^{-1}$                                                                                                                                                           | $\theta_{\text{max}} = 30.5^\circ$ , $\theta_{\text{min}} = 2.9^\circ$ |
| $\omega$ scans                                                                                                                                                                                                  | $h = -10 \rightarrow 10$                                               |
| Absorption correction: multi-scan <i>CrysAlis PRO</i> 1.171.42.49 (Rigaku Oxford Diffraction, 2022) Empirical absorption correction using spherical harmonics, implemented in SCALE3 ABSPACK scaling algorithm. | $k = -17 \rightarrow 17$                                               |
| $T_{\text{min}} = 0.959$ , $T_{\text{max}} = 1.000$                                                                                                                                                             | $l = -20 \rightarrow 20$                                               |
| 42723 measured reflections                                                                                                                                                                                      |                                                                        |

**Refinement**

|                                 |                                                                                     |
|---------------------------------|-------------------------------------------------------------------------------------|
| Refinement on $F^2$             | 0 restraints                                                                        |
| Least-squares matrix: full      | Hydrogen site location: mixed                                                       |
| $R[F^2 > 2\sigma(F^2)] = 0.048$ | H atoms treated by a mixture of independent and constrained refinement              |
| $wR(F^2) = 0.131$               | $w = 1/[\sigma^2(F_o^2) + (0.0492P)^2 + 0.8436P]$<br>where $P = (F_o^2 + 2F_c^2)/3$ |
| $S = 1.06$                      | $(\Delta/\sigma)_{\text{max}} = 0.001$                                              |
| 6762 reflections                | $\Delta_{\text{max}} = 0.49 \text{ e \AA}^{-3}$                                     |
| 304 parameters                  | $\Delta_{\text{min}} = -0.39 \text{ e \AA}^{-3}$                                    |

### Special details

*Geometry.* All esds (except the esd in the dihedral angle between two l.s. planes) are estimated using the full covariance matrix. The cell esds are taken into account individually in the estimation of esds in distances, angles and torsion angles; correlations between esds in cell parameters are only used when they are defined by crystal symmetry. An approximate (isotropic) treatment of cell esds is used for estimating esds involving l.s. planes.

### Computing details

Data collection: *CrysAlis PRO* 1.171.42.49 (Rigaku OD, 2022); cell refinement: *CrysAlis PRO* 1.171.42.49 (Rigaku OD, 2022); data reduction: *CrysAlis PRO* 1.171.42.49 (Rigaku OD, 2022); program(s) used to refine structure: *SHELXL* 2018/3 (Sheldrick, 2015); molecular graphics: *Olex2* 1.5 (Dolomanov *et al.*, 2009); software used to prepare material for publication: *Olex2* 1.5 (Dolomanov *et al.*, 2009).

**Table S2.** Fractional atomic coordinates and isotropic or equivalent isotropic displacement parameters ( $\text{\AA}^2$ ) for (a61322\_mo)

|      | <i>x</i>    | <i>y</i>     | <i>z</i>     | $U_{\text{iso}}^*/U_{\text{eq}}$ | Occ. (<1) |
|------|-------------|--------------|--------------|----------------------------------|-----------|
| Cu1  | 0.19614 (4) | 0.65013 (2)  | 1.07596 (2)  | 0.04356 (10)                     |           |
| O11  | 0.2862 (3)  | 0.60138 (15) | 0.95971 (13) | 0.0505 (4)                       |           |
| O2   | 0.5532 (3)  | 1.33849 (17) | 0.52786 (14) | 0.0620 (5)                       |           |
| N12  | 0.2853 (3)  | 0.80974 (18) | 0.97170 (16) | 0.0413 (4)                       |           |
| O10  | 0.4487 (3)  | 0.65695 (16) | 0.79722 (13) | 0.0522 (4)                       |           |
| O14  | 0.5020 (3)  | 0.59127 (16) | 1.14234 (15) | 0.0511 (4)                       |           |
| H14A | 0.600615    | 0.631678     | 1.111859     | 0.077*                           |           |
| H14B | 0.531058    | 0.517727     | 1.153910     | 0.077*                           |           |
| N15  | 0.0940 (3)  | 0.49149 (18) | 1.17244 (16) | 0.0457 (4)                       |           |
| O27  | 0.5479 (6)  | 0.7889 (3)   | 0.5769 (2)   | 0.1113 (12)                      |           |
| H27A | 0.506549    | 0.751043     | 0.547994     | 0.167*                           |           |
| H27B | 0.535250    | 0.747538     | 0.643246     | 0.167*                           |           |
| N21  | 0.0795 (3)  | 0.6903 (2)   | 1.20118 (16) | 0.0468 (4)                       |           |
| N4   | 0.5181 (4)  | 1.22531 (19) | 0.70318 (16) | 0.0513 (5)                       |           |
| H4   | 0.502412    | 1.223687     | 0.765841     | 0.062*                           |           |
| O31  | -0.3854 (3) | 0.8548 (2)   | 1.0485 (2)   | 0.0730 (6)                       |           |
| N29  | -0.2171 (3) | 0.8374 (2)   | 1.00933 (18) | 0.0504 (5)                       |           |
| O28  | -0.1572 (3) | 0.7333 (2)   | 1.0208 (2)   | 0.0730 (6)                       |           |
| C3   | 0.5368 (4)  | 1.3314 (2)   | 0.61963 (18) | 0.0460 (5)                       |           |

|      |             |              |              |             |            |
|------|-------------|--------------|--------------|-------------|------------|
| N13  | 0.5375 (4)  | 1.42915 (19) | 0.63971 (17) | 0.0557 (6)  |            |
| H13A | 0.549507    | 1.498839     | 0.588466     | 0.067*      |            |
| H13B | 0.525987    | 1.422137     | 0.703811     | 0.067*      |            |
| C9   | 0.3730 (4)  | 0.6777 (2)   | 0.87544 (18) | 0.0419 (5)  |            |
| O30  | -0.1117 (4) | 0.9197 (2)   | 0.9616 (3)   | 0.1193 (13) |            |
| C22  | 0.0002 (4)  | 0.5959 (3)   | 1.28571 (19) | 0.0505 (6)  |            |
| C23  | -0.0821 (4) | 0.6072 (4)   | 1.3794 (2)   | 0.0672 (8)  |            |
| H23  | -0.137270   | 0.541946     | 1.437039     | 0.081*      |            |
| C16  | 0.0076 (3)  | 0.4842 (3)   | 1.26917 (19) | 0.0502 (6)  |            |
| C20  | 0.1089 (4)  | 0.3954 (2)   | 1.1488 (2)   | 0.0554 (6)  |            |
| H20  | 0.167162    | 0.402104     | 1.081170     | 0.067*      |            |
| C18  | -0.0469 (5) | 0.2782 (3)   | 1.3218 (3)   | 0.0794 (11) |            |
| H18  | -0.092689   | 0.205418     | 1.372704     | 0.095*      |            |
| C19  | 0.0406 (5)  | 0.2872 (3)   | 1.2214 (3)   | 0.0680 (8)  |            |
| H19  | 0.052754    | 0.221115     | 1.203648     | 0.082*      |            |
| C5   | 0.5238 (5)  | 1.1134 (3)   | 0.6902 (2)   | 0.0663 (8)  |            |
| H5A  | 0.441302    | 1.122685     | 0.641305     | 0.080*      |            |
| H5B  | 0.652418    | 1.095367     | 0.659802     | 0.080*      |            |
| C7   | 0.4590 (6)  | 0.8954 (3)   | 0.7856 (2)   | 0.0674 (9)  |            |
| H7BC | 0.432023    | 0.909834     | 0.717003     | 0.081*      | 0.488 (14) |
| H7BD | 0.586097    | 0.857478     | 0.788662     | 0.081*      | 0.488 (14) |
| H7AA | 0.360275    | 0.901290     | 0.746640     | 0.081*      | 0.512 (14) |
| H7AB | 0.579077    | 0.880228     | 0.744987     | 0.081*      | 0.512 (14) |
| C24  | -0.0818 (5) | 0.7163 (4)   | 1.3869 (3)   | 0.0764 (10) |            |
| H24  | -0.135162   | 0.724940     | 1.449743     | 0.092*      |            |
| C26  | 0.0766 (4)  | 0.7948 (3)   | 1.2086 (2)   | 0.0592 (7)  |            |
| H26  | 0.129364    | 0.859748     | 1.149639     | 0.071*      |            |
| C6   | 0.4646 (7)  | 1.0148 (3)   | 0.7890 (2)   | 0.0777 (11) |            |
| H6A  | 0.338371    | 1.036086     | 0.819767     | 0.093*      |            |
| H6B  | 0.549475    | 1.006342     | 0.836460     | 0.093*      |            |
| C25  | -0.0017 (5) | 0.8111 (4)   | 1.3006 (3)   | 0.0714 (9)  |            |
| H25  | -0.000065   | 0.885317     | 1.303648     | 0.086*      |            |
| C17  | -0.0651 (5) | 0.3761 (3)   | 1.3451 (3)   | 0.0710 (9)  |            |
| H17  | -0.126043   | 0.371291     | 1.411834     | 0.085*      |            |
| C8B  | 0.3289 (14) | 0.8092 (4)   | 0.8641 (4)   | 0.0424 (17) | 0.488 (14) |
| H8B  | 0.207673    | 0.832671     | 0.838555     | 0.051*      | 0.488 (14) |
| C8A  | 0.4262 (11) | 0.7915 (5)   | 0.8843 (4)   | 0.0392 (15) | 0.512 (14) |
| H8A  | 0.548100    | 0.769938     | 0.909148     | 0.047*      | 0.512 (14) |
| H12A | 0.372 (5)   | 0.838 (3)    | 0.986 (3)    | 0.062 (9)*  |            |
| H12B | 0.189 (6)   | 0.851 (4)    | 0.964 (3)    | 0.081 (12)* |            |

**Table S3.** Atomic displacement parameters ( $\text{\AA}^2$ ) for (a61322\_mo)

|     | $U^{11}$     | $U^{22}$     | $U^{33}$     | $U^{12}$      | $U^{13}$     | $U^{23}$      |
|-----|--------------|--------------|--------------|---------------|--------------|---------------|
| Cu1 | 0.05292 (18) | 0.03860 (16) | 0.03474 (15) | -0.01065 (12) | 0.00253 (11) | -0.01291 (11) |
| O11 | 0.0705 (12)  | 0.0383 (8)   | 0.0394 (8)   | -0.0133 (8)   | 0.0023 (8)   | -0.0151 (7)   |
| O2  | 0.0949 (15)  | 0.0500 (10)  | 0.0337 (8)   | -0.0101 (10)  | 0.0041 (9)   | -0.0152 (7)   |
| N12 | 0.0473 (11)  | 0.0364 (9)   | 0.0375 (10)  | -0.0063 (9)   | 0.0006 (8)   | -0.0149 (8)   |
| O10 | 0.0729 (12)  | 0.0436 (9)   | 0.0388 (8)   | -0.0052 (8)   | -0.0012 (8)  | -0.0190 (7)   |
| O14 | 0.0612 (11)  | 0.0415 (9)   | 0.0511 (10)  | -0.0001 (8)   | -0.0098 (8)  | -0.0198 (8)   |
| N15 | 0.0432 (10)  | 0.0435 (10)  | 0.0420 (10)  | -0.0090 (8)   | -0.0022 (8)  | -0.0095 (8)   |
| O27 | 0.189 (3)    | 0.103 (2)    | 0.0446 (12)  | -0.067 (2)    | 0.0018 (17)  | -0.0253 (13)  |
| N21 | 0.0444 (11)  | 0.0538 (12)  | 0.0399 (10)  | -0.0025 (9)   | -0.0023 (8)  | -0.0190 (9)   |
| N4  | 0.0725 (15)  | 0.0412 (10)  | 0.0341 (9)   | -0.0075 (10)  | -0.0021 (9)  | -0.0114 (8)   |
| O31 | 0.0590 (13)  | 0.0928 (17)  | 0.0845 (16)  | 0.0068 (11)   | -0.0113 (11) | -0.0564 (14)  |
| N29 | 0.0505 (12)  | 0.0487 (12)  | 0.0564 (12)  | -0.0035 (9)   | -0.0166 (10) | -0.0215 (10)  |
| O28 | 0.0631 (13)  | 0.0605 (13)  | 0.1078 (19)  | 0.0016 (10)   | -0.0152 (12) | -0.0473 (13)  |
| C3  | 0.0526 (13)  | 0.0437 (12)  | 0.0359 (11)  | -0.0084 (10)  | 0.0006 (9)   | -0.0127 (9)   |
| N13 | 0.0840 (17)  | 0.0409 (11)  | 0.0406 (11)  | -0.0103 (11)  | -0.0110 (10) | -0.0128 (9)   |
| C9  | 0.0508 (13)  | 0.0362 (10)  | 0.0374 (10)  | -0.0039 (9)   | -0.0063 (9)  | -0.0139 (9)   |
| O30 | 0.0683 (16)  | 0.0537 (14)  | 0.184 (3)    | -0.0098 (12)  | -0.0324 (19) | 0.0098 (17)   |
| C22 | 0.0393 (12)  | 0.0685 (16)  | 0.0348 (11)  | 0.0002 (11)   | -0.0057 (9)  | -0.0134 (11)  |
| C23 | 0.0530 (16)  | 0.098 (2)    | 0.0421 (14)  | 0.0020 (15)   | -0.0020 (11) | -0.0242 (15)  |
| C16 | 0.0397 (12)  | 0.0594 (15)  | 0.0373 (11)  | -0.0063 (10)  | -0.0044 (9)  | -0.0056 (10)  |
| C20 | 0.0558 (15)  | 0.0453 (13)  | 0.0598 (16)  | -0.0104 (11)  | -0.0059 (12) | -0.0155 (12)  |
| C18 | 0.072 (2)    | 0.0530 (17)  | 0.081 (2)    | -0.0212 (15)  | -0.0062 (17) | 0.0068 (16)   |
| C19 | 0.0583 (17)  | 0.0435 (14)  | 0.091 (2)    | -0.0120 (12)  | -0.0135 (16) | -0.0126 (14)  |
| C5  | 0.093 (2)    | 0.0462 (14)  | 0.0508 (15)  | -0.0107 (14)  | 0.0117 (15)  | -0.0205 (12)  |
| C7  | 0.099 (2)    | 0.0457 (14)  | 0.0474 (14)  | -0.0201 (15)  | 0.0186 (15)  | -0.0197 (12)  |
| C24 | 0.0625 (19)  | 0.122 (3)    | 0.0550 (17)  | 0.0111 (19)   | -0.0086 (14) | -0.051 (2)    |
| C26 | 0.0569 (16)  | 0.0682 (18)  | 0.0605 (16)  | -0.0043 (13)  | -0.0049 (13) | -0.0359 (14)  |
| C6  | 0.129 (3)    | 0.0440 (15)  | 0.0498 (16)  | -0.0240 (17)  | 0.0089 (17)  | -0.0146 (12)  |
| C25 | 0.0601 (18)  | 0.097 (3)    | 0.079 (2)    | 0.0051 (17)   | -0.0102 (16) | -0.060 (2)    |
| C17 | 0.0643 (18)  | 0.067 (2)    | 0.0528 (16)  | -0.0150 (15)  | 0.0016 (13)  | 0.0019 (14)   |
| C8B | 0.056 (4)    | 0.034 (2)    | 0.037 (2)    | -0.003 (2)    | -0.012 (2)   | -0.0114 (18)  |
| C8A | 0.042 (3)    | 0.040 (2)    | 0.036 (2)    | -0.009 (2)    | -0.004 (2)   | -0.0150 (18)  |

Document origin: *publCIF* [Westrip, S. P. (2010). *J. Apply. Cryst.*, **43**, 920-925]

Structure factors have been supplied for datablock(s) a61322\_mo

THIS REPORT IS FOR GUIDANCE ONLY. IF USED AS PART OF A REVIEW PROCEDURE FOR PUBLICATION, IT SHOULD NOT REPLACE THE EXPERTISE OF AN EXPERIENCED CRYSTALLOGRAPHIC REFEREE.

No syntax errors found.

CIF dictionary Interpreting this report

## Datablock: a61322\_mo

---

|                        |                                    |                                                                   |
|------------------------|------------------------------------|-------------------------------------------------------------------|
| Bond precision:        | C-C = 0.0046 Å                     | Wavelength=0.71073                                                |
| Cell:                  | a=7.2136(3)<br>alpha=65.430(4)     | b=12.2497(6)<br>beta=77.331(3)<br>c=14.1356(6)<br>gamma=82.046(3) |
| Temperature:           | 293 K                              |                                                                   |
| Volume                 | Calculated<br>1106.76(9)           | Reported Volume<br>1106.75(9)                                     |
| Space group            | P -1                               | P -1                                                              |
| Hall group             | -P 1                               | -P 1                                                              |
| Moiety formula         | C16 H22 Cu N6 O7, H2 O [+ solvent] | C16 H20 Cu N5 O3, 2(H2 O), N O3                                   |
| Sum formula            | C16 H24 Cu N6 O8 [+<br>solvent]    | C16 H24 Cu N6 O8                                                  |
| Mr                     | 491.96                             | 491.95                                                            |
| Dx, g cm <sup>-3</sup> | 1.476                              | 1.476                                                             |
| Z                      | 2                                  | 2                                                                 |
| Mu (mm <sup>-1</sup> ) | 1.040                              | 1.040                                                             |
| F000                   | 510.0                              | 510.0                                                             |
| F000'                  | 510.87                             |                                                                   |
| h, k, lmax             | 11, 19, 22                         | 11, 19, 22                                                        |
| Nref                   | 9922                               | 9456                                                              |
| Tmin, Tmax             | 0.737, 0.813                       | 0.959, 1.000                                                      |
| Tmin'                  | 0.714                              |                                                                   |

Correction method= # Reported T Limits: Tmin=0.959 Tmax=1.000 AbsCorr = MULTI-SCAN

|                               |                    |
|-------------------------------|--------------------|
| Data completeness= 0.953      | Theta(max)= 35.242 |
| R(reflections)= 0.0547( 6079) | wR2(reflections)=  |
| 0.1484( 9456)                 |                    |
| S = 1.017                     | Npar= 304          |

---

The following ALERTS were generated. Each ALERT has the format

**test-name\_ALERT\_alert-type\_alert-level.**

Click on the hyperlinks for more details of the test.

---

### Alert level C

|                                                          |                                           |     |             |
|----------------------------------------------------------|-------------------------------------------|-----|-------------|
| PLAT241_ALERT_2_C High                                   | 'MainMol' Ueq as Compared to Neighbors of | O28 | Check       |
| PLAT242_ALERT_2_C Low                                    | 'MainMol' Ueq as Compared to Neighbors of | N29 | Check       |
| PLAT260_ALERT_2_C Large Average Ueq of Residue Including |                                           | O27 | 0.111 Check |

---

### Alert level G

|                                                                    |        |        |        |             |
|--------------------------------------------------------------------|--------|--------|--------|-------------|
| PLAT007_ALERT_5_G Number of Unrefined Donor-H Atoms .....          |        |        | 7      | Report      |
| PLAT042_ALERT_1_G Calc. and Reported MoietyFormula Strings         | Differ | Please |        | Check       |
| PLAT199_ALERT_1_G Reported _cell_measurement_temperature ..... (K) |        | 293    |        | Check       |
| PLAT200_ALERT_1_G Reported _diffn_ambient_temperature ..... (K)    |        | 293    |        | Check       |
| PLAT301_ALERT_3_G Main Residue Disorder .....(Resd                 | 1      | )      | 3%     | Note        |
| PLAT414_ALERT_2_G Short Intra D-H..H-X                             | H8A    | ..H12A | .      | 1.83 Ang.   |
|                                                                    |        | x,y,z  | =      | 1_555 Check |
| PLAT414_ALERT_2_G Short Intra D-H..H-X                             | H12B   | ..H8B  | .      | 1.87 Ang.   |
|                                                                    |        | x,y,z  | =      | 1_555 Check |
| PLAT605_ALERT_4_G Largest Solvent Accessible VOID in the Structure |        |        | 71     | A**3        |
| PLAT720_ALERT_4_G Number of Unusual/Non-Standard Labels .....      |        |        | 4      | Note        |
| PLAT883_ALERT_1_G No Info/Value for _atom_sites_solution_primary . |        |        | Please | Do !        |
| PLAT910_ALERT_3_G Missing # of FCF Reflection(s) Below Theta(Min). |        |        | 3      | Note        |
| PLAT912_ALERT_4_G Missing # of FCF Reflections Above STh/L=        |        | 0.600  | 462    | Note        |
| PLAT933_ALERT_2_G Number of HKL-OMIT Records in Embedded .res File |        |        | 1      | Note        |
| PLAT978_ALERT_2_G Number C-C Bonds with Positive Residual Density. |        |        | 3      | Info        |

---

---



## Publication of your CIF in IUCr journals

A basic structural check has been run on your CIF. These basic checks will be run on all CIFs submitted for publication in IUCr journals (*Acta Crystallographica*, *Journal of Applied Crystallography*, *Journal of Synchrotron Radiation*); however, if you intend to submit to *Acta Crystallographica Section C* or *E* or *IUCrData*, you should make sure that full publication checks are run on the final version of your CIF prior to submission.

## Publication of your CIF in other journals

Please refer to the *Notes for Authors* of the relevant journal for any special instructions relating to CIF submission.

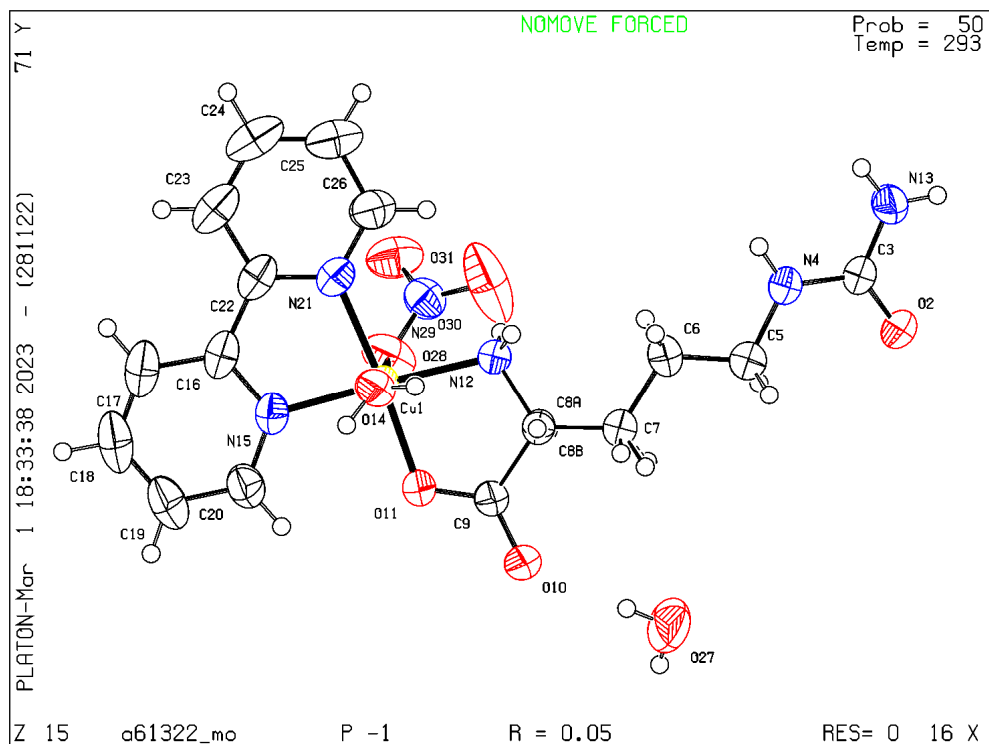

PLATON version of 28/11/2022; check.def file version of 28/11/2022
